# Supplementary material for: Extraction and characterization methods for titanium dioxide nanoparticles from commercialized sunscreens
Source: Royal Society of Chemistry journal article supplement (doi:10.1039/c7en00677b), 2017-11-30
Supplement: c7en00677b1.pdf [file c7en00677b1.pdf]

# 1 **Clean and efficient extraction method of TiO<sub>2</sub> nanoparticles from** 2 **commercialized sunscreens (supporting information)**

3 *Allan Philippe,<sup>a\*</sup> Juraj Košík,<sup>b</sup> Alexander Welle,<sup>c</sup> Jean-Michel Guigner,<sup>d</sup> Oliver Clemens,<sup>e</sup> Gabriele E.*  
4 *Schaumann<sup>a</sup>*

5 \* Corresponding author (phone: +49-6341 280 31589, email: philippe@uni-landau.de).

6 <sup>a</sup> Group of Environmental and Soil Chemistry, Institute for Environmental Sciences, University of Koblenz-  
7 Landau, Fortstrasse 7, 76829, Landau, Germany.

8 <sup>b</sup> Faculty of Chemistry, Brno University of Technology, Antonínská 548/1,601 90, 75007 Brno, Czech Republic.

9 <sup>c</sup> Institut für Funktionelle Grenzflächen, Karlsruhe Nano Micro Facility, Karlsruhe Institute for Technology,  
10 Hermann-von-Helmholtz-Platz 1, 76344, Eggenstein-Leopoldshafen, Germany.

11 <sup>d</sup> Institut de Minéralogie, de Physique des Matériaux et de Cosmochimie (IMPMC), Sorbonne Universities -  
12 UPMC University Paris 06, UMR CNRS 7590, MNHN, IRD UR 206, 75252 Paris cedex 05, France.

13 <sup>e</sup> Faculty of Material Science, Technische Universität Darmstadt, Materials Design by Synthesis, Alarich-Weiss-  
14 Straße 2, 64287, Darmstadt, Germany.

15

16 *List of ingredients for each tested sunscreen as provided on the packaging*

## 17 **S1: Rewe Feuchtigkeits-Sonnenspray**

18 Aqua, C12-15 Alkyl Benzoate, Octocrylene, Alcohol, Glycerin, Titanium dioxide, Butyl  
19 Methoxydibenzoylmethane, VP/Hexadecene copolymer, Stearyl Dimethicone, Panthenol, Butyrospermum Parkii  
20 Butter, Ethylhexylglycerin, Tocopheryl Acetate, Microcrystalline Cellulose, Trimethoxycaprylylsilane,  
21 Acrylates/C10-30 Alkyl Acrylate Crosspolymer, Disodium EDTA, Cellulose Gum, Sodium Hydroxide,  
22 Carbomer.

## 23 **S2: Rewe Feuchtigkeits-Sonnencreme**

24 Aqua, Octocrylene, Alcohol, C12-15 Alkyl Benzoate, Glycerin, Titanium dioxide, Butyl  
25 Methoxydibenzoylmethane, Prophyheptyl, Caprylate, Bis-Ethylhexyloxyphenol Methoxyphenyl Triazine,  
26 VP/Hexadecene copolymer, Tricontanyl PVP, Stearyl Dimethicone, Panthenol, Butyrospermum Parkii Butter,  
27 Tocopheryl Acetate, Ethylhexylglycerin, Trimethoxycaprylylsilane, Acrylates/C10-30 Alkyl Acrylate  
28 Crosspolymer, Carbomer, Sodium Hydroxide, Xanthan Gum, Disodium EDTA, Tocopherol.

## 29 **S3: Real,- Quality Sonnenmilch**

30 Aqua, Alcohol denat., Octocrylene, Glycerin, C 12-15 Alkyl Benzoate, Butyl Methoxydibenzoylmethane,  
31 Ethylhexyl Salicylate, Titanium Dioxide (nano), Dicaprylyl Carbonate, Tocopheryl Acetate, VP/Hexadecene  
32 copolymer, Panthenol, Silica, Parfum, Acrylates/C10-30 Alkyl Acrylate Crosspolymer, Ethylhexylglycerin,  
33 Sodium Hydroxide, Carbomer, 1,2-Hexanediol, Caprylyl Glycol, Xanthan Gum, Disodium edta, Dimethicone,  
34 Citral, Benzyl Alcohol, Linalool, Citronellol, Tocopherol.

35 **S4: Real,- Quality Sonnencreme**

36 Aqua, Octocrylene, C 12-15 Alkyl Benzoate, Glycerin, Butyl Methoxydibenzoylmethane, Titanium dioxide  
37 (nano), Bis-Ethylhexyloxyphenol Methoxyphenyl Triazine, Potassium Cetyl Phosphate, Triacontanyl PVP,  
38 Dicaprylyl Carbonate, Cetearyl Alcohol, Tocopheryl Acetate, Panthenol, Phenoxyethanol, Butylene Glycol,  
39 Parfum, Acrylates/C10-30 Alkyl Acrylate Crosspolymer, Polyglyceryl-2 Sesquiosostearate, Methylparaben,  
40 Aminomethyl Propanol, Simethicone, Sodium Benzoate, Xanthan Gum, Disodium EDTA, Salvia Triloba Leaf  
41 Extract, Helianthus Annuus Seed Oil, Citric Acid, Citral, Benzyl Alcohol, Litchi chinensis Pericarp Extract,  
42 Linalool, Citronellol, Tocopherol.

43 **S5: Biotherm Lait Solaire:**

44 Aqua, C 12-15 Alkyl Benzoate, Octocrylene, Propylene Glycol, Glycerin, Ethylhexyl Salicylate, Isohexadecane,  
45 Butyl Methoxydibenzoylmethane, Titanium dioxide, Nylon-12, Zea Mays Starch, Alcohol denat., Bis-  
46 Ethylhexyloxyphenol Methoxyphenyl Triazine, PEG-100 Stearate, Potassium Cetyl Phosphate, Glyceryl  
47 stearate, Synthetic wax, Stearic acid, Triethanolamine, Phenoxyethanol, Dimethicone, Caprylyl Glycol,  
48 Terephthalylidene Dicamphor Sulfonic Acid, Aluminium Hydroxide, Limonene, Xanthan Gum, Acrylates/C10-  
49 30 Alkyl Acrylate Crosspolymer, Disodium EDTA, Linalool, Tocopherol, Vitreoscilla Ferment, Citrus Grandis  
50 Extract, Citronellol, Citral, benzyl Alcohol, Parfum.

51 **S6: Nivea Sun Pflgende Sonnenmilch**

52 Aqua, Butylene Glycol Dicaprylate/Dicaprate, Glycerin, C12-15 Alkyl Benzoate, Butyl  
53 Methoxydibenzoylmethane, Octocrylene, Titanium Dioxide, Alcohol Denat., Bis-Ethylhexyloxyphenol  
54 Methoxyphenyl Triazine, Dicaprylyl Carbonate, Cetearyl Alcohol, Sodium Phenylbenzimidazole Sulfonate,  
55 Cetyl Alcohol, C18-36 Acid Triglyceride, Glyceryl Stearate SE | Diethylhexyl Butamido Triazone, Ethylhexyl  
56 Methoxycinnamate, Tocopheryl Acetate, PEG-40 Castor Oil, Sodium Cetearyl Sulfate, Hydrogenated Coco-  
57 Glycerides, Xanthan Gum, VP/Hexadecene Copolymer, Trimethoxycaprylylsilane, Trisodium EDTA,  
58 Ethylhexylglycerin, Phenoxyethanol, Methylparaben, Propylparaben, Linalool, Benzyl Alcohol, Limonene,  
59 Benzyl Benzoate, Hydroxyisohexyl 3-Cyclohexene Carboxaldehyde, Hexyl Cinnamal, Benzyl Salicylate,  
60 Butylphenyl Methylpropional, Alpha-Isomethyl Ionone, Eugenol, Citronellol, Coumarin, Parfum..

**61 S7: Sundance Sonnenmilch**

62 Aqua, Octocrylene, Alcohol denat., Glycerin, C12-15 alkyl benzoate, Butyl methoxydibenzoylmethane,  
63 Ethylhexyl salicylate, Titanium dioxide, Dicaprylyl carbonate, Tocopheryl acetate, Silica, Panthenol, Bis-  
64 ethylhexyloxyphenol methoxyphenyl triazine, Triacontanyl PVP, VP/Hexadecene copolymer, acrylates/C10-30  
65 alkyl acrylate crosspolymer, Parfum, Sodium hydroxide, Ethylhexylglycerin, Maltodextrin, 1,2-Hexanediol,  
66 Caprylyl glycol, Carbomer, Xanthan gum, Dimethicone, Citric acid, Disodium EDTA, Limonene, Alpha-  
67 isomethyl ionone, Camellia sinensis leaf extract, Benzyl alcohol, Tocopherol..

**68 S8: Garnier Ambre Solaire Resisto Sonnenschutz-Milch**

69 Aqua, C12-15 Alkyl Benzoate, Alcohol Denat., Isohexadecane, Ethylhexyl Salicylate, Propylene Glycol,  
70 Titanium Dioxide, Cyclohexasiloxane, Butyl Methoxydibenzoylmethane, PEG-30 Dipolyhydroxystearate, BIS-  
71 Ethylhexyloxyphenol Methoxyphenyl Triazine, Octocrylene, Glycerin, Cyclopentasiloxane, Lauryl PEG/PPG-  
72 18/18 Methicone, Terephthalylidene Dicamphor Sulfonic Acid, Synthetic Wax, Ethylhexyl Triazone,  
73 Tocopherol, Dodecene, Triethanolamine, Silica, Poloxamer 407, Dimethicone, Ammonium  
74 Polyacryldimethyltauramide/Ammonium Polyacryloyldimethyl Taurate, Simmondsia chinensis oil/Jojoba Seed  
75 oil, Pentasodium Ethylenediamine Tetramethylene Phosphonate, Drometizole Trisiloxane, Isopropyl Lauroyl  
76 Sarcosinate, Isostearyl alcohol, Caprylyl Glycol, Distearidimonium Hectorite.

**77 S9: Alverde Sonnencreme Jojoba**

78 Aqua, Titanium Dioxide, Cocoglycerides, Helianthus Annuus Seed Oil, Isoamyl Laurate, Polyglyceryl-2  
79 Dipolyhydroxystearate, Glycerin, Polyglyceryl-3 Polyricinoleate, Helianthus Annuus Seed Cera, Simmondsia  
80 Chinensis Seed Oil, Magnesium Sulfate, Olea Europaea Fruit Oil, Alumina, Stearic Acid, Glyceryl Caprylate,  
81 Levulinic Acid, Tocopherol, p-Anisic Acid, Sodium Levulinate.

**82 S10: Babylove Sonnencreme**

83 Aqua, Zink oxide (nano), Hydrogenated polyisobutene, Poly-glyceryl-2 dipolyhydroxystearate, Titanium dioxide  
84 (nano), Glycerin, Hydrogenated Polydecene, Hydrogenated poly 6-14 olefin, Butylene glycol, Glyceryl oleate,  
85 Tocopheryl acetate, Butyrospermum parkii butter, Magnesium sulfate, Panthenol, Aluminum hydroxide,  
86 Ethylhexylglycerin, Stearic acid.

**87 S11: Baby sebamed Sonnenschutzlotion**

88 Aqua, C12-15 Alkyl Benzoate, Cetearyl Isononanoate, Octocrylene, Glycerin, Propylene Glycol, Polyglyceryl-2  
89 Dipolyhydroxystearate, Ethylhexyl Salicylate, Butyl Methoxydibenzoylmethane, Diethylamino Hydroxybenzoyl  
90 Hexyl Benzoate, Panthenol, Dimethicone, Titanium Dioxide, Diethylhexyl Butamido Triazone, Magnesium  
91 Sulfate, Tocopheryl Acetate, Phenoxyethanol, Zinc Stearate, Cera alba, Glyceryl Oleate, Bis-

92 Ethylhexyloxyphenol Methoxyphenyl Triazine, Parfum, Silica, Ethylhexylglycerin, Sorbic Acid, Inulin,  
93 Lecithin.

94

95 *Method validation for the quantification of TiO<sub>2</sub> in sunscreens*

96 In order to confirm that the proposed digestion procedure effectively dissolved our samples and that matrix  
97 effects could be ignored, we perform a matrix matched calibration curve with our external standards (P25  
98 powder Degussa) with masses of TiO<sub>2</sub> in the digestion beakers ranging from 0.01 to 10 mg of TiO<sub>2</sub> standard and  
99 a standard addition with 0,5 and 1 mg of TiO<sub>2</sub> added to S5. The data evaluation was performed using Excel. The  
100 recovery of the method was determined using the counts values obtained from the standard addition samples  
101 using the external calibration curve and knowing the expected added masses of TiO<sub>2</sub>. The average recovery was  
102 104%. The slopes obtained using external calibrants and standard addition (SI-table 1) did not differ significantly  
103 (t-test, p = 0.697). Therefore, we consider the possible matrix effects as negligible. The recovery for ionic  
104 standards (Ti dissolved in 0.1% HF, SCP, Germany) was interestingly lower than for TiO<sub>2</sub> (76%). This may be  
105 due to the sorption of Ti ions on the glass beakers used for the digestion. Therefore, we decided to use TiO<sub>2</sub>  
106 standard as calibrants, since it is chemically closer to our target analytes and avoid an absolute error in the  
107 determination of the concentration.

108

109 **SI-Table 1: Slopes for the calibration curves using external standards (P25 powder, 9 concentrations) and**  
110 **using a standard addition procedure using S5 (three concentrations). Standard deviations are determined**  
111 **over 4 replicates. Regression factors were determined for the combined replicates.**

|                                   | External calibration | Standard addition | Ratio in % |
|-----------------------------------|----------------------|-------------------|------------|
| Average slope in mg <sup>-1</sup> | 6.08                 | 6.4               | 95         |
| Standard Deviation                | 0.02                 | 1.6               |            |
| R <sup>2</sup>                    | 0.9988               | 0.9656            |            |

112

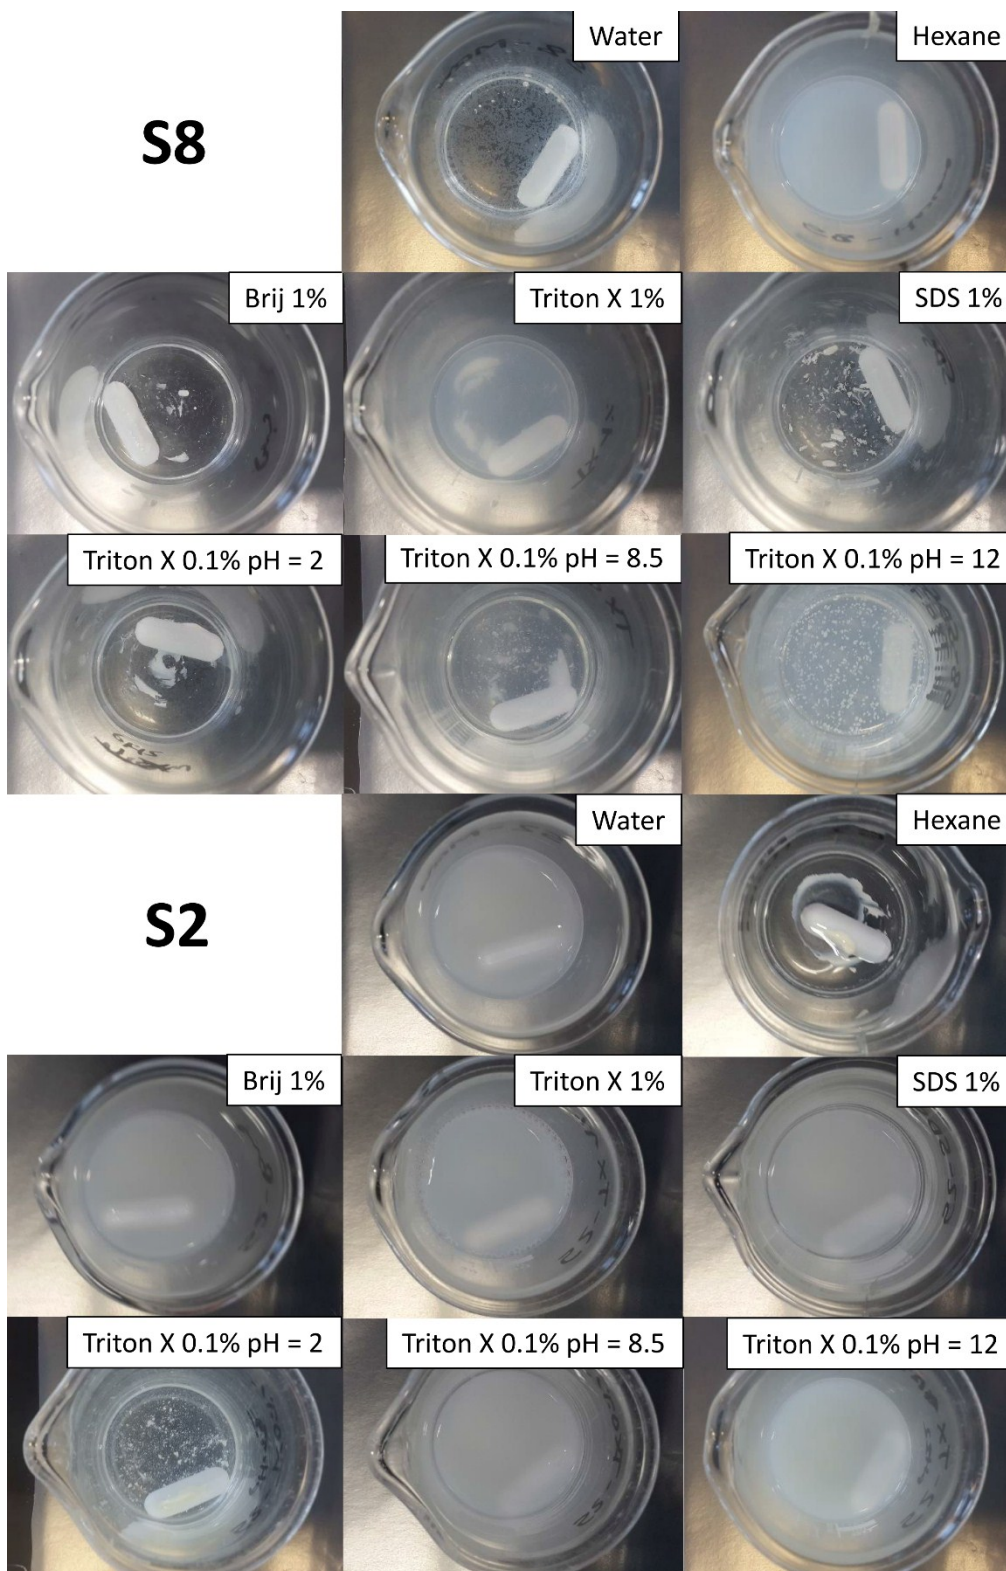

115

116 SI-Figure 1: Picture of S5 and S2 (50 mg each) suspended in, from left to right and from top to bottom, in  
 117 10 mL pure water, n-hexane, Brij L35, Triton X-100, sodium dodecyl sulfate (SDS) (the three latter 1 %  
 118 (w/w) in water), and Triton X-100 (0.1 % (w/w) in water) at pH = 2, 8.5 (without pH adjustment), and 12  
 119 and stirred at room temperature for 30 min.

120 *Dynamic light scattering experiments*

121 The minimal required sonication time was determined using particles extracted from sunscreen 5 and further  
122 diluted in 1 % Triton X-100 aqueous solution at a concentration of 41.8 mg L<sup>-1</sup>. 10 mL of diluted suspension was  
123 transferred into PP centrifuge tubes. Each tube was exposed in a sonication bath for different amount of time and  
124 measured directly after sonication using dynamic light scattering. Particle size decreased from 0 to 15 min  
125 sonication time and staid constant between 15 and 30 minutes (**SI-table 1**). Therefore, a sonication of 5 min was  
126 chosen since longer sonication would not have further reduced particle size.

127

128 **SI-Table 2: average hydrodynamic diameters of particles extracted from S5 measured using dynamic light**  
129 **scattering after different sonication times. Standard deviations were determined from three measurement**  
130 **replicates.**

| <b>Sonication Time (min)</b> | <b>0</b> | <b>5</b> | <b>10</b> | <b>15</b> | <b>20</b> | <b>30</b> |
|------------------------------|----------|----------|-----------|-----------|-----------|-----------|
| <b>Average</b>               | 131.3    | 125.2    | 120.7     | 111.8     | 115.7     | 114.8     |
| <b>Standard Deviation</b>    | 7.7      | 5.9      | 4.2       | 4.4       | 3.7       | 4.1       |

131

132 Furthermore, we observed that the dilution ratio had a significant influence on the size measured using dynamic  
133 light scattering. Therefore, we measured the size of particles extracted from S5 after dilution at different ratios in  
134 1 % Triton X-100 aqueous solution. Dilution rates higher than 1:300 resulted in poor accuracy of the size  
135 estimation due to low scattered light intensity. Each sample was ultrasonicated for 15 min prior to size  
136 determination. Particle size decreased with increasing dilution rate until 1:200 and no further decrease in size  
137 was observed at a dilution rate of 1:300 (**SI-table 1**). Particles were most probably completely disagglomerated  
138 after ultrasound treatment. However, they were not stable and started to agglomerate as soon as sonication  
139 stopped. The lower the particle concentration is, the lower is the agglomeration rate. Therefore, decreasing  
140 particle concentration improved size measurement by slowing agglomeration rate until its effect on the size  
141 determination is negligible. Thus, we chose a dilution rate of 1:200 for all DLS measurements as it warranted a  
142 operatively stable suspension and a high scattered light intensity.

143

145 SI-Table 3: average hydrodynamic diameters of particles extracted from S5 measured using dynamic light  
 146 scattering after dilution at different rates. Standard deviations were determined from three measurement  
 147 replicates.

| Dilution rate      | 1:10 | 1:20 | 1:50 | 1:100 | 1:200 | 1:300 |
|--------------------|------|------|------|-------|-------|-------|
| Average            | 99.1 | 65.5 | 54.5 | 28.1  | 24.5  | 24.5  |
| Standard Deviation | 3.2  | 2.7  | 2.4  | 1.3   | 1.1   | 1.5   |

148

149 *Cryogenic transmission electron microscopy*

150

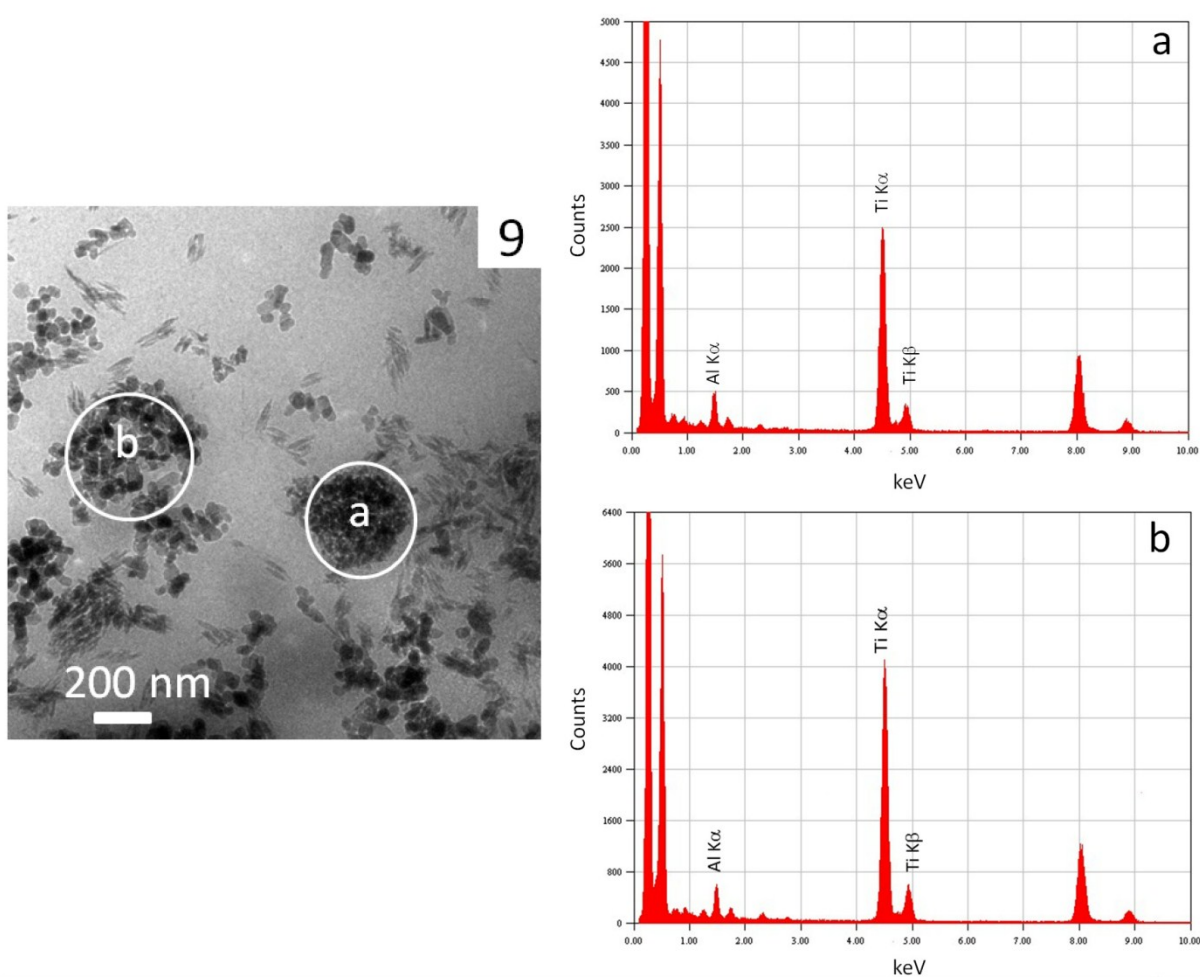

151

152 SI-Figure 2: Image and the corresponding EDX-spectra of  $\text{TiO}_2$  particles from S9 obtained using  
 153 transmission electron microscopy in cryogenic mode. The length of the scale bar is 200 nm. The peaks at  
 154 0.25 (C  $K_\alpha$ ), 0.5 (O  $K_\alpha$ ), 8 (Cu  $K_\alpha$ ), and 9 (Cu  $K_\beta$ ) keV in the EDX spectrum correspond to C and O present  
 155 in sunscreen's components (water and organic molecules) and the carbon coating of the sample grid. and  
 156 to Cu from the grid itself, respectively.



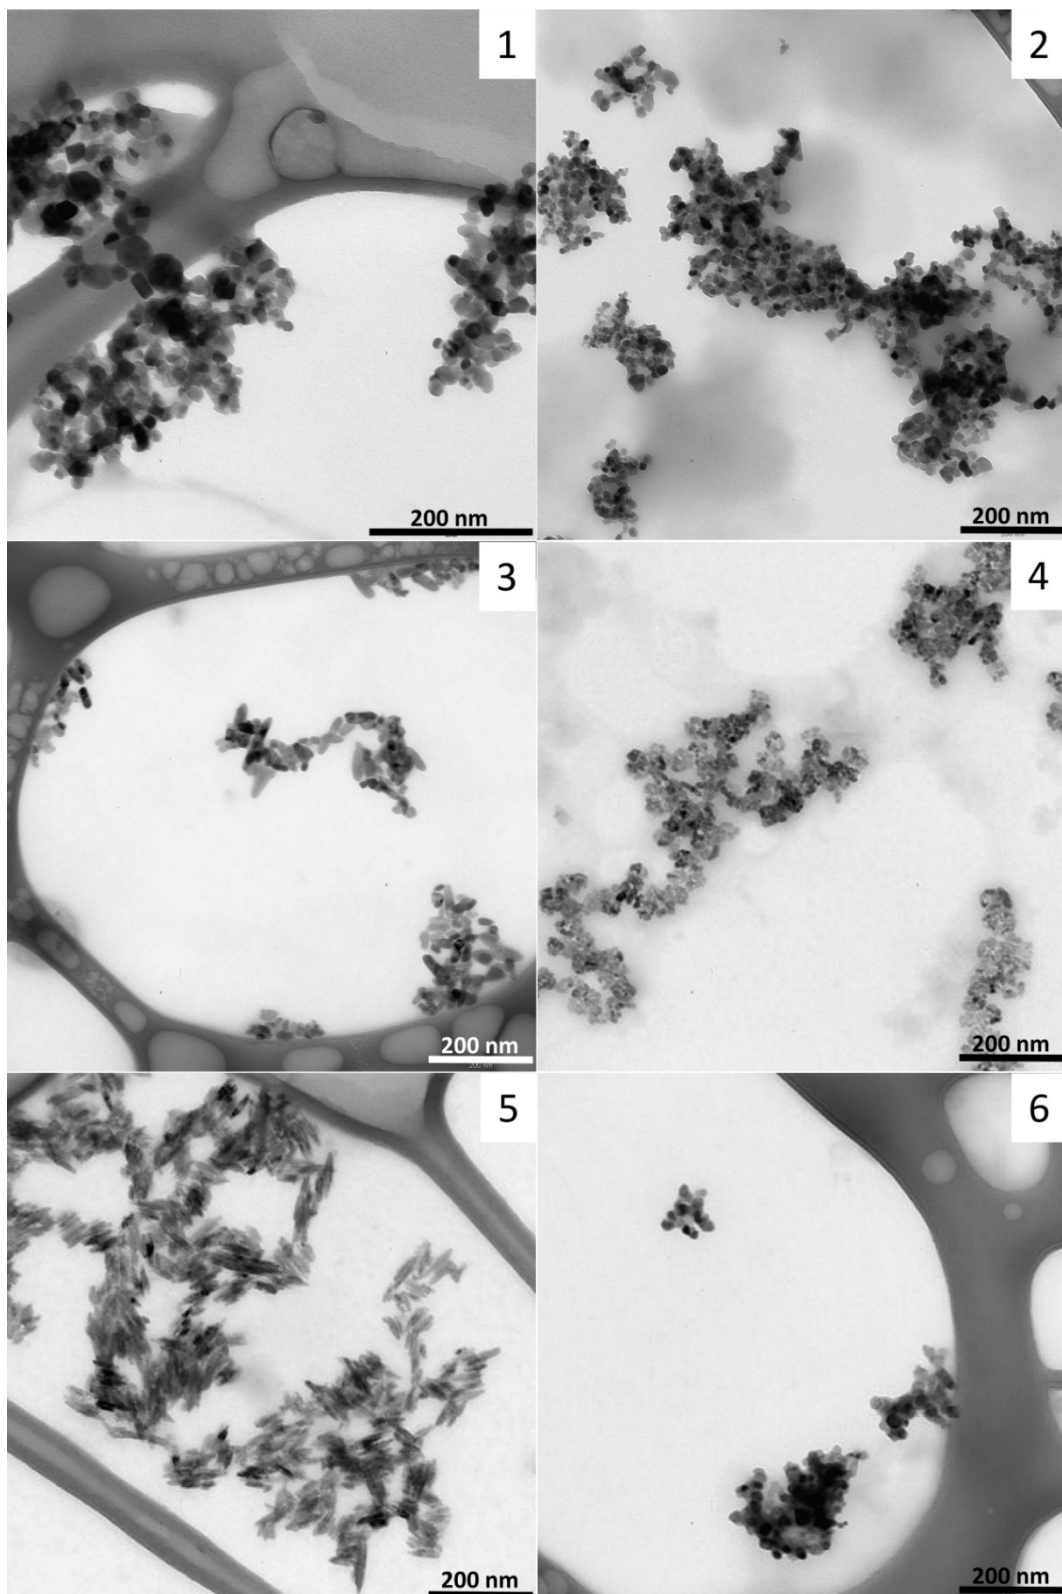

158

159 SI-Figure 3: Representative images of extracted inorganic nanoparticles from eleven commercial  
160 sunscreens obtained using transmission electron microscopy. The sunscreen number is given on the upper  
161 right corner. The length of the scale bar is 200 nm.



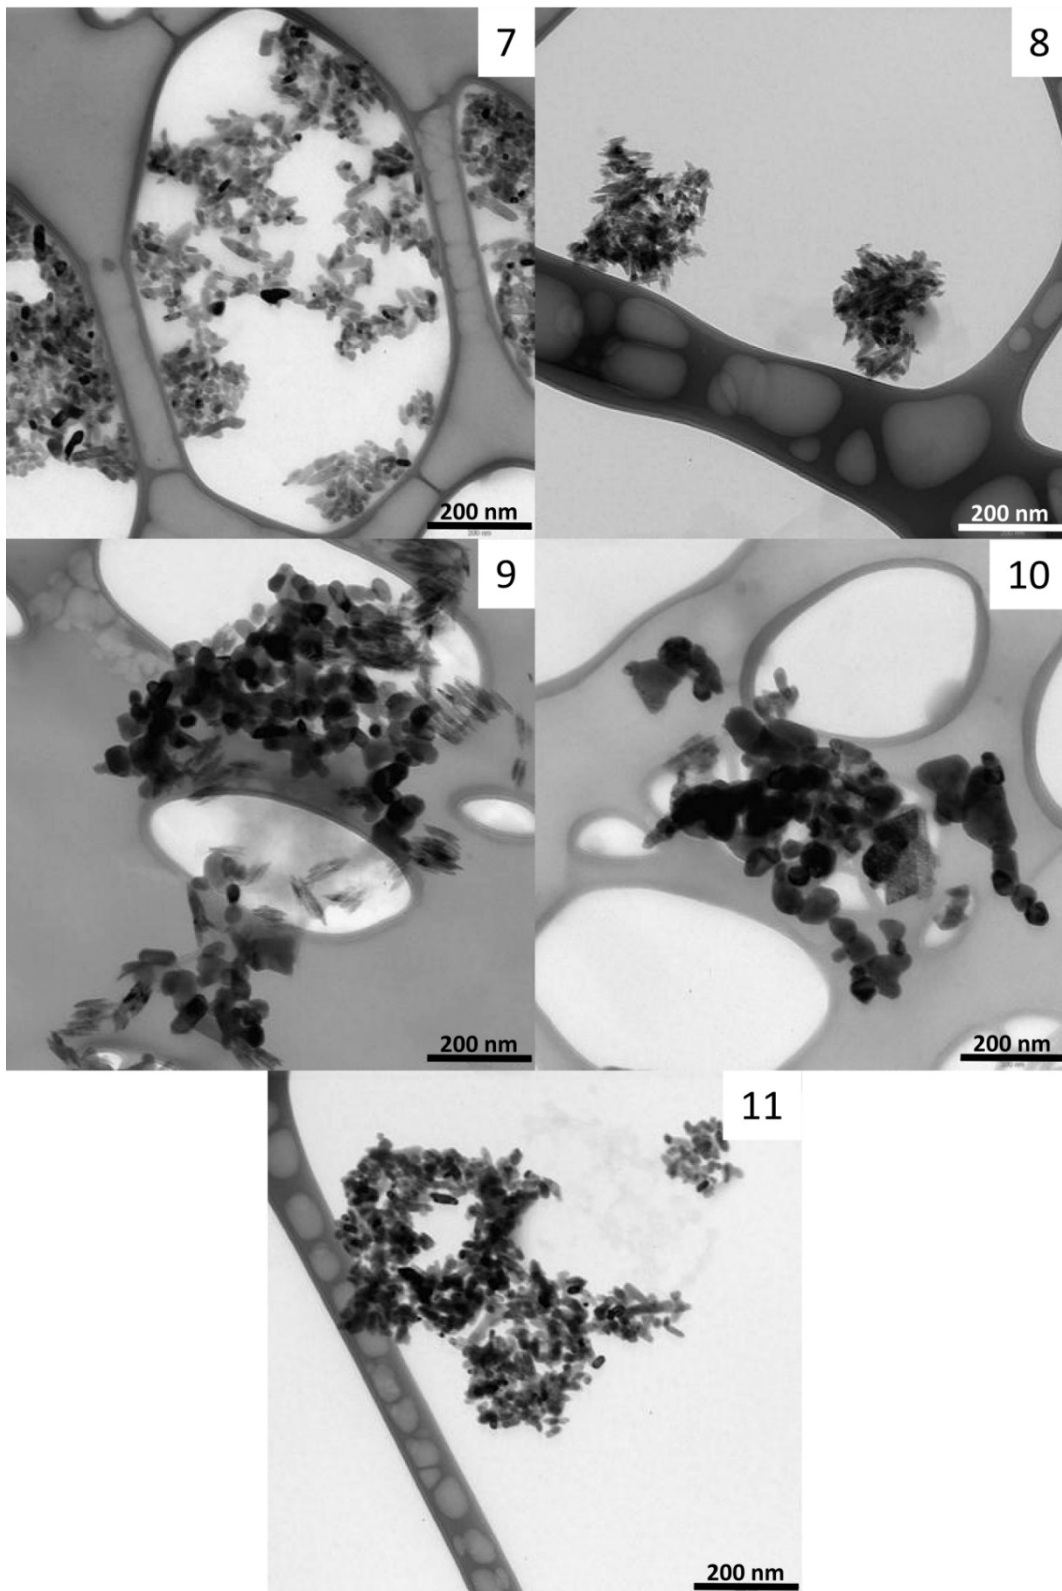

162

163 SI-Figure 3: Continuation and end.

164

165

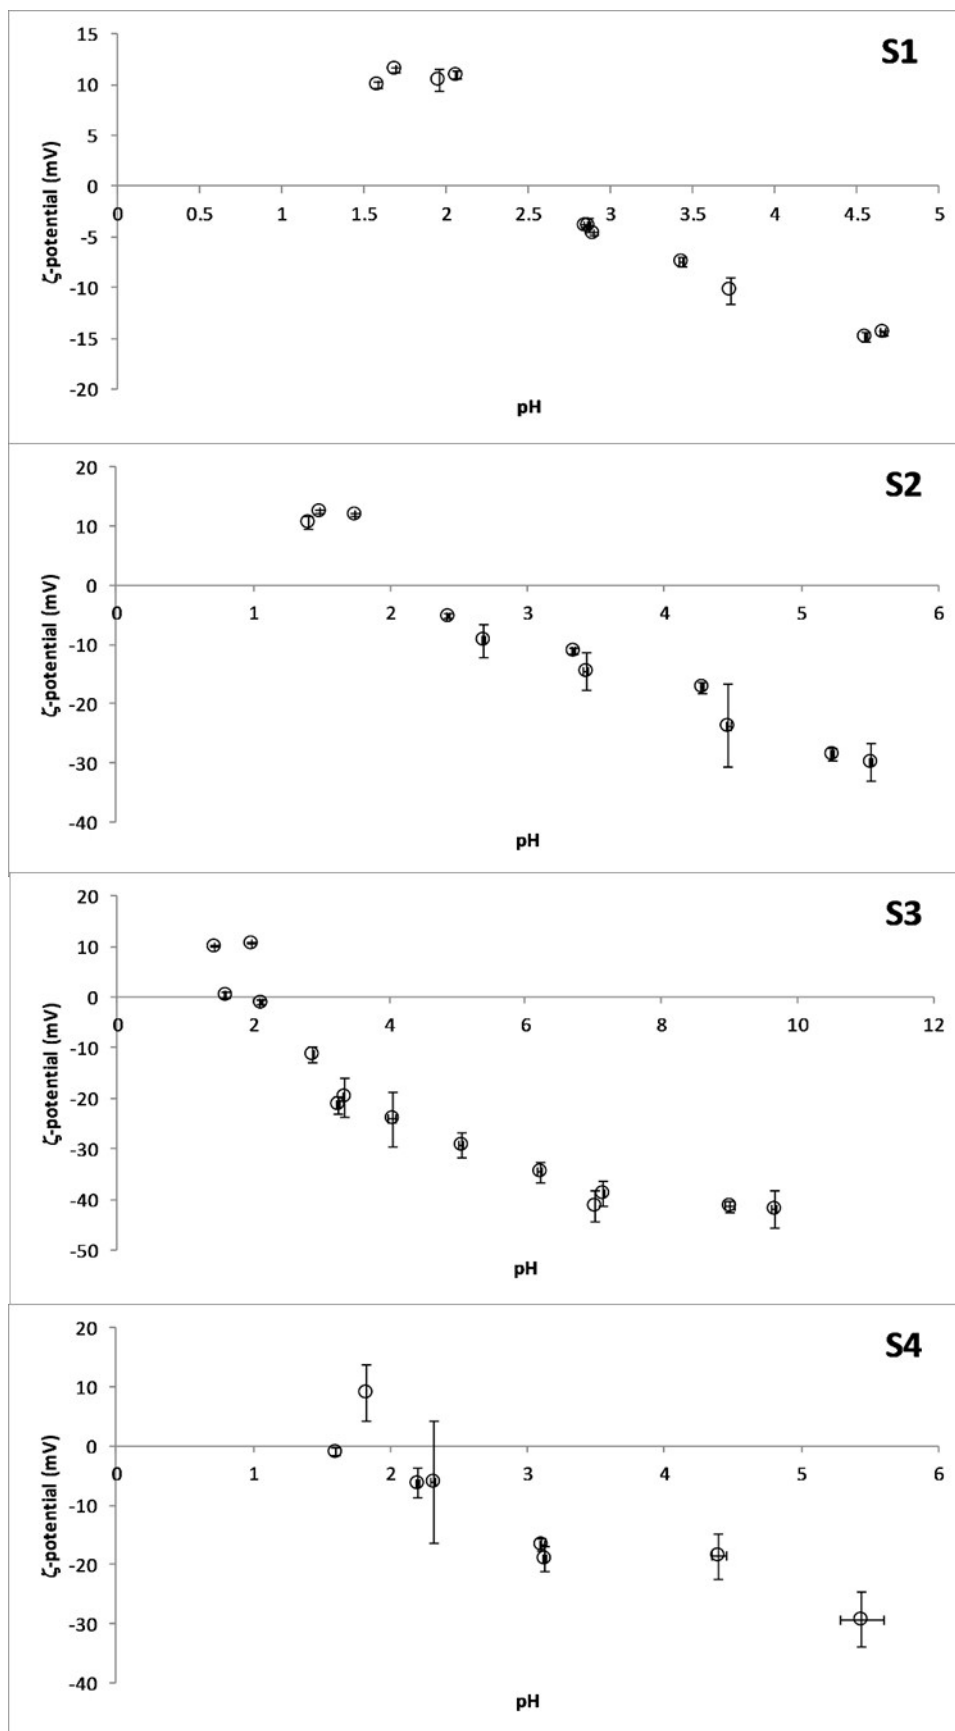

166

167 SI-Figure 4:  $\zeta$ -potential measurements at different pH values of nanoparticles extracted from sunscreens  
 168 and suspended in a 10 mM solution containing 0.1 % Triton X-100. These data were used for calculating  
 169 isoelectric points.

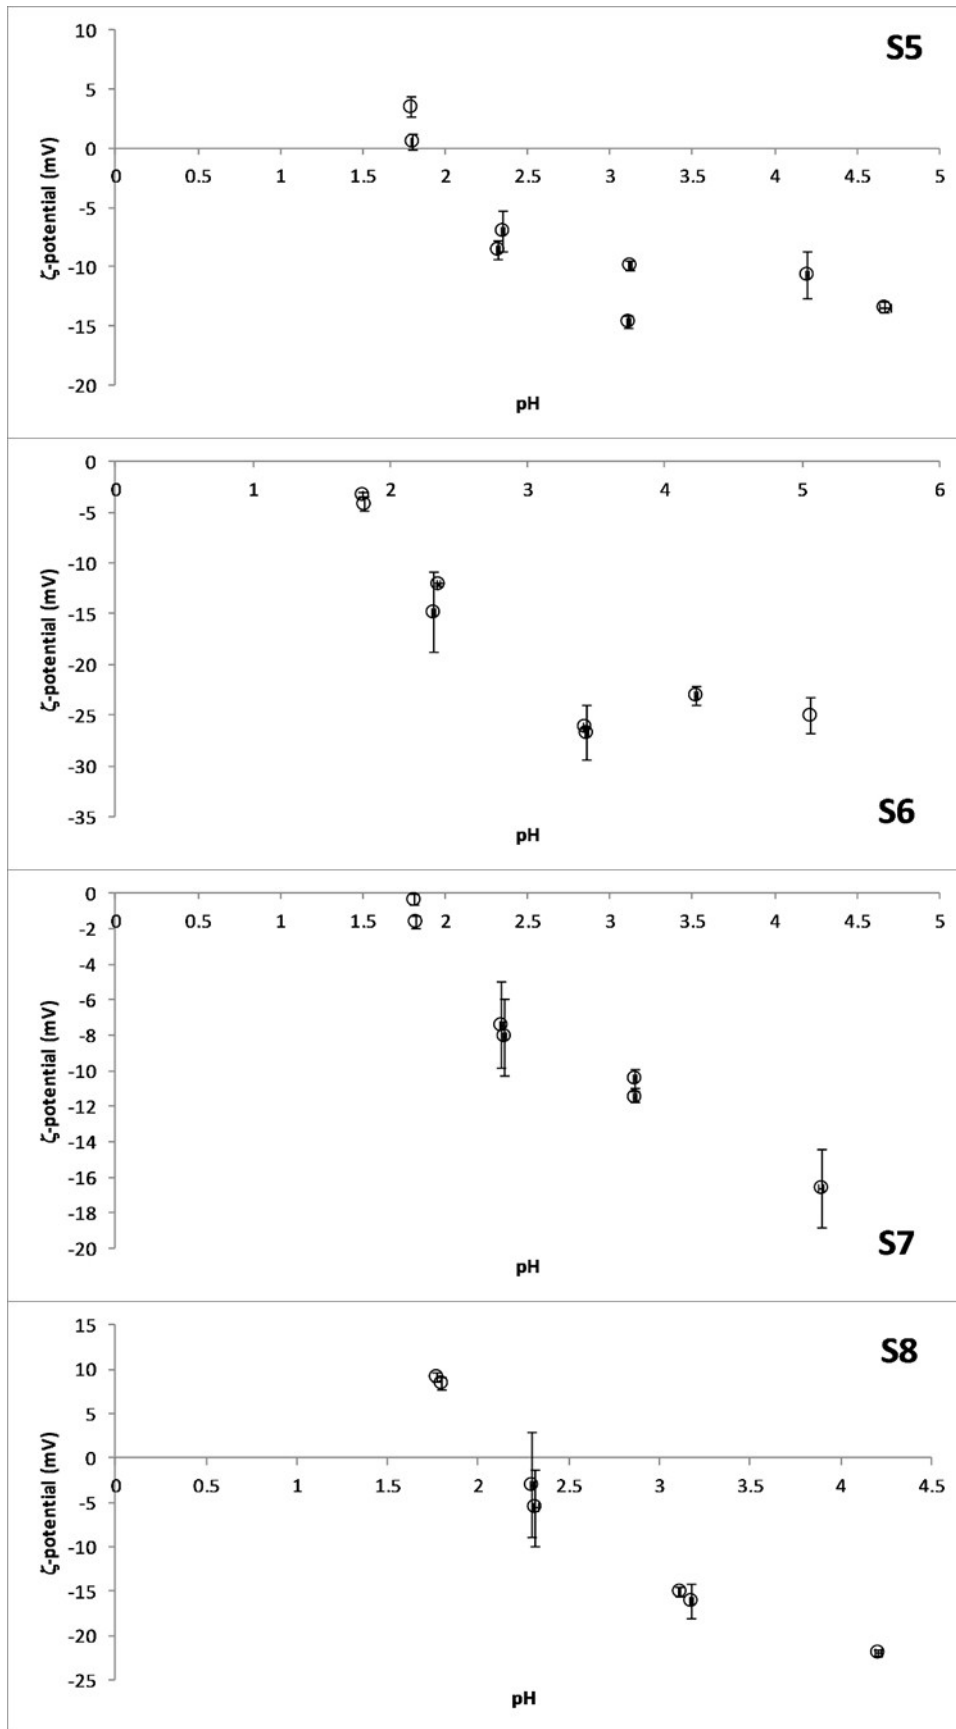

170

171 SI-Figure 4: Continuation.

172

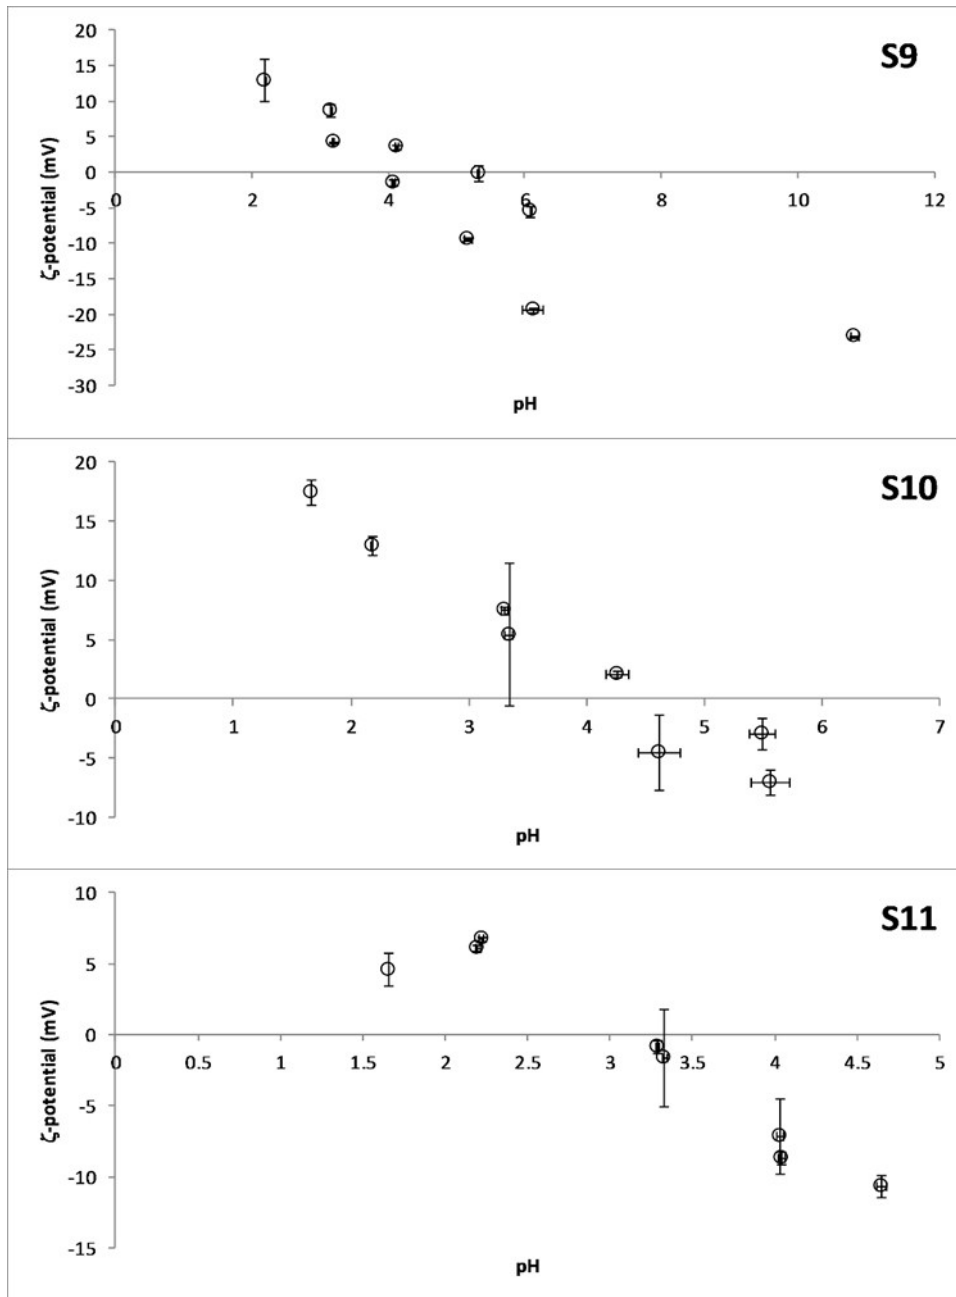

173

174 SI-Figure 4: Continuation and end.

175

176

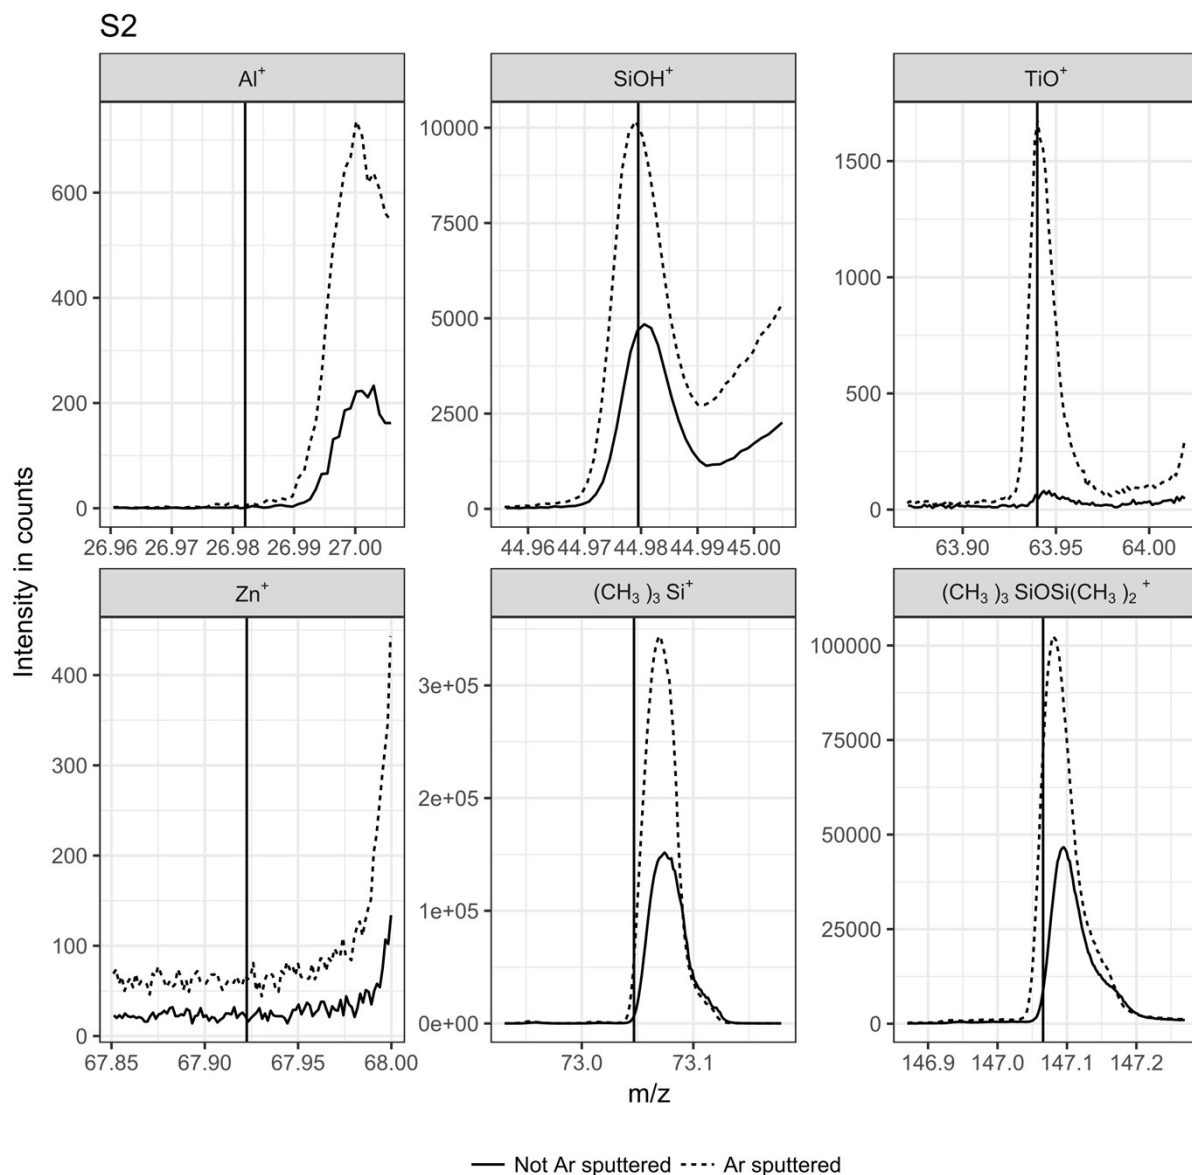

177

178 SI-Figure 5: ToF-SIMS signal intensities obtained before (full line) and with (dashed line) Ar-clusters  
 179 sputtering for the sunscreens extracts S2. Vertical lines indicate the exact mass expected from the  
 180 respective ions or fragments; from left to right:  $^{27}\text{Al}^+$ ,  $^{28}\text{SiOH}^+$ ,  $^{48}\text{TiO}^+$ ,  $^{68}\text{Zn}^+$ ,  $(\text{CH}_3)_3\text{Si}^+$ , and  
 181  $(\text{CH}_3)_3\text{SiOSi}(\text{CH}_3)_2^+$ . The two latter are characteristic fragments for polydimethylsiloxane.

182

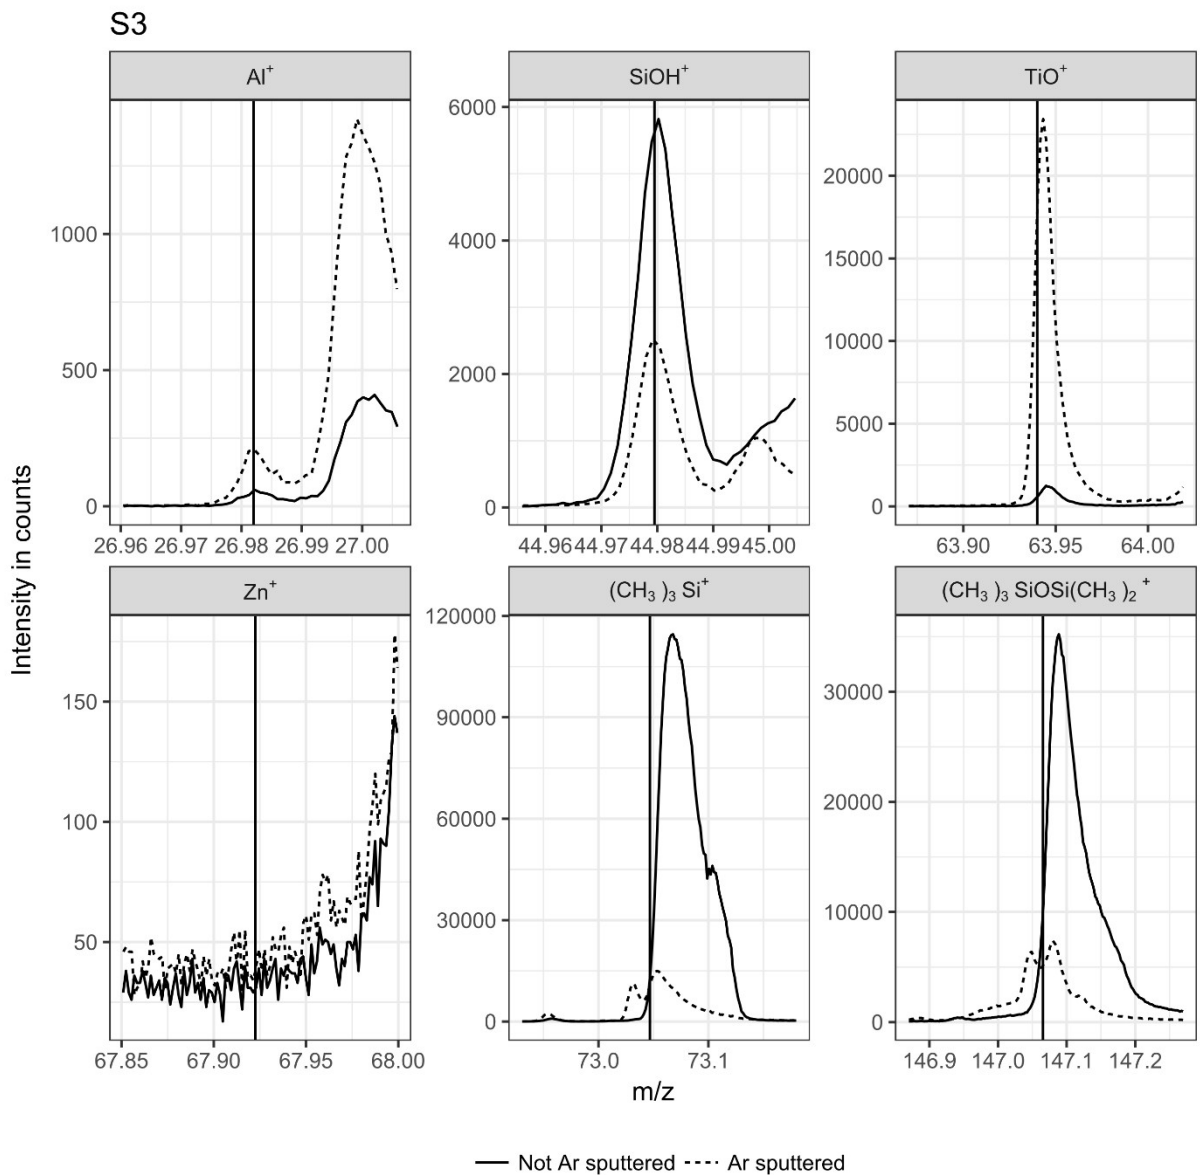

183

184 SI-Figure 6: ToF-SIMS signal intensities for the sunscreens extracts S3. See SI-figure 5 for more details.



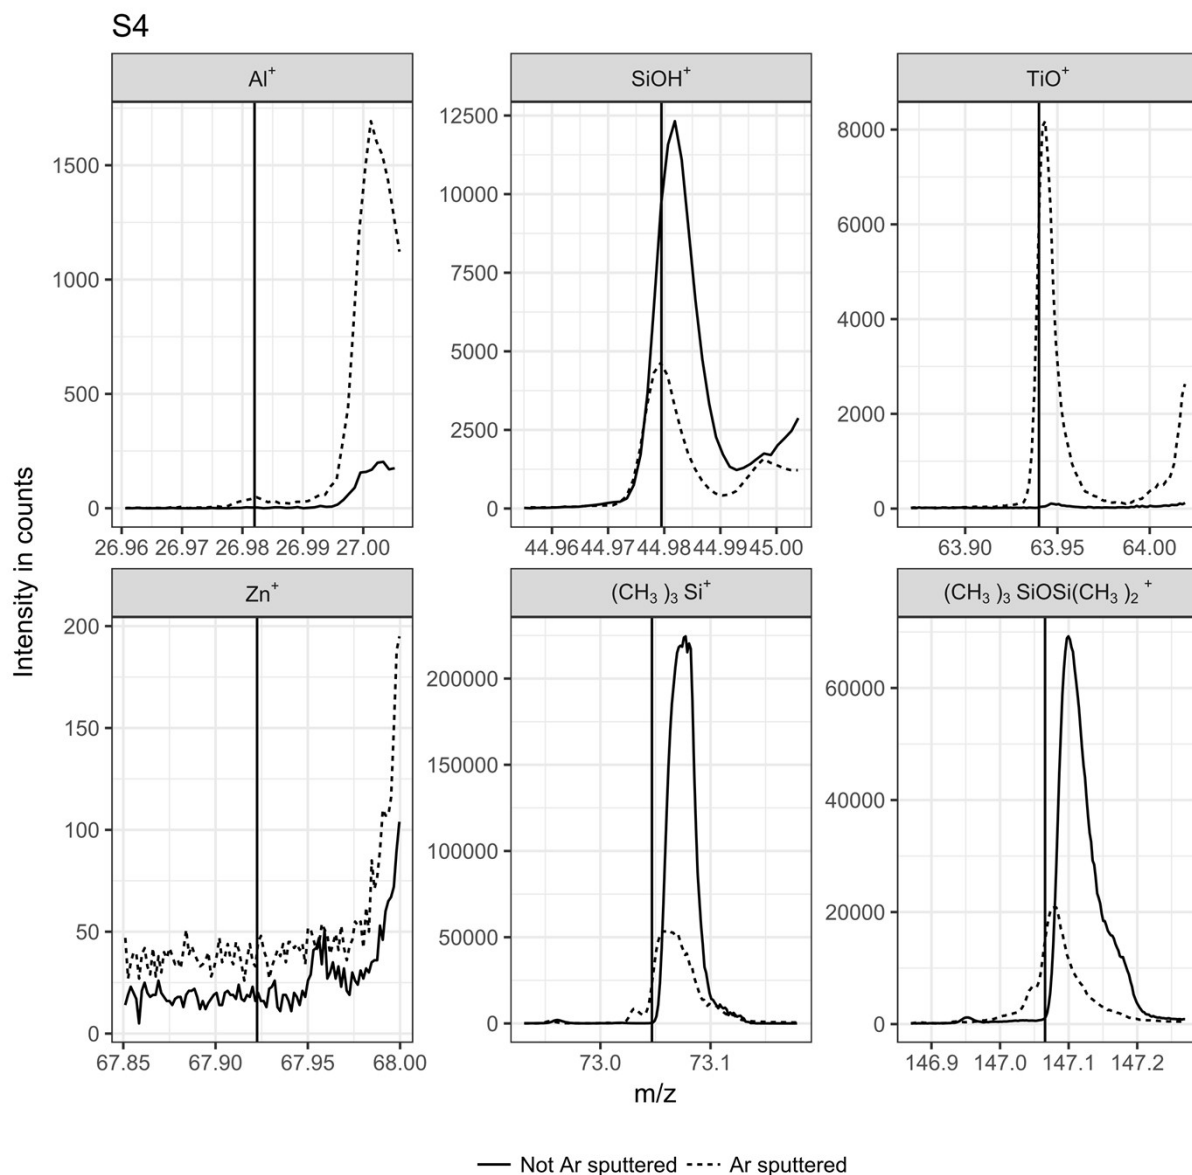

185

186 SI-Figure 7: ToF-SIMS signal intensities for the sunscreens extracts S4. See SI-figure 5 for more details.

187

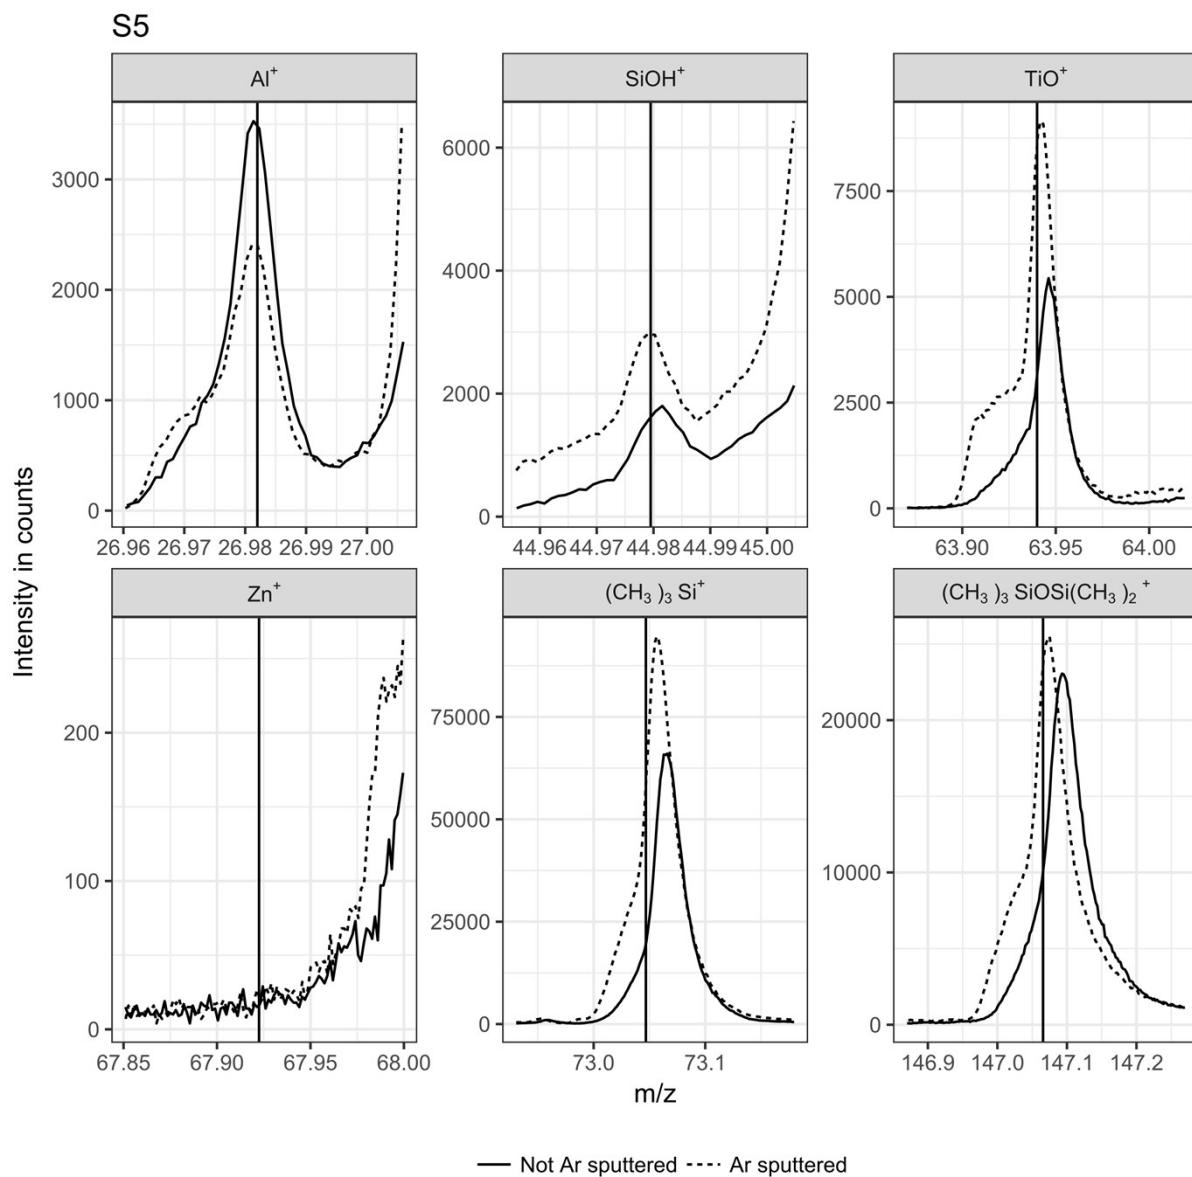

188

189 SI-Figure 8: ToF-SIMS signal intensities for the sunscreens extracts S5. See SI-figure 5 for more details.

190

S6

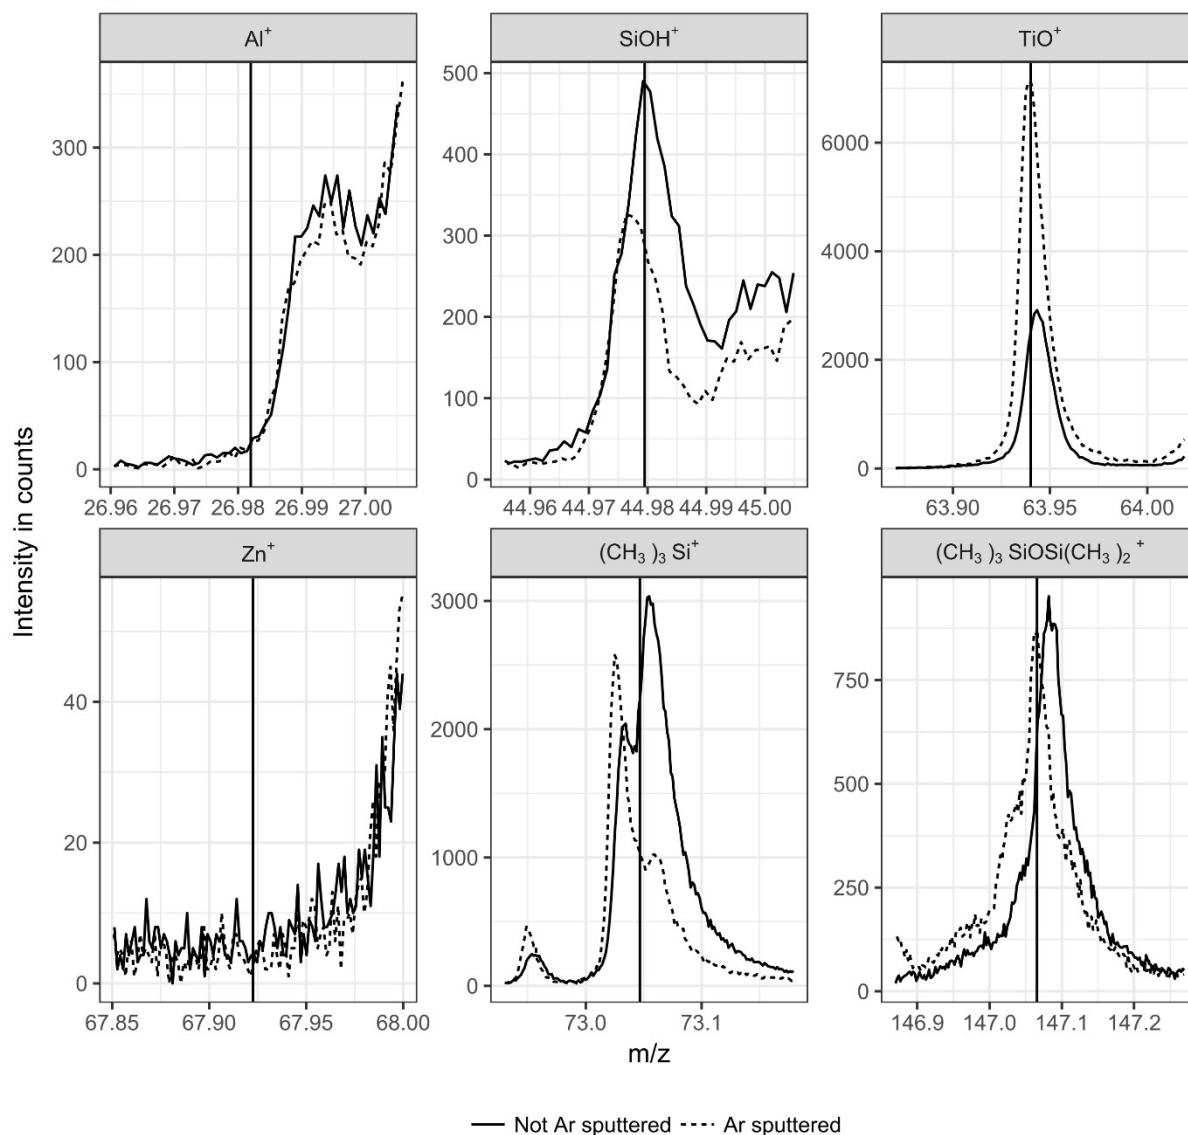

191

192 SI-Figure 9: ToF-SIMS signal intensities for the sunscreens extracts S6. See SI-figure 5 for more details.

193

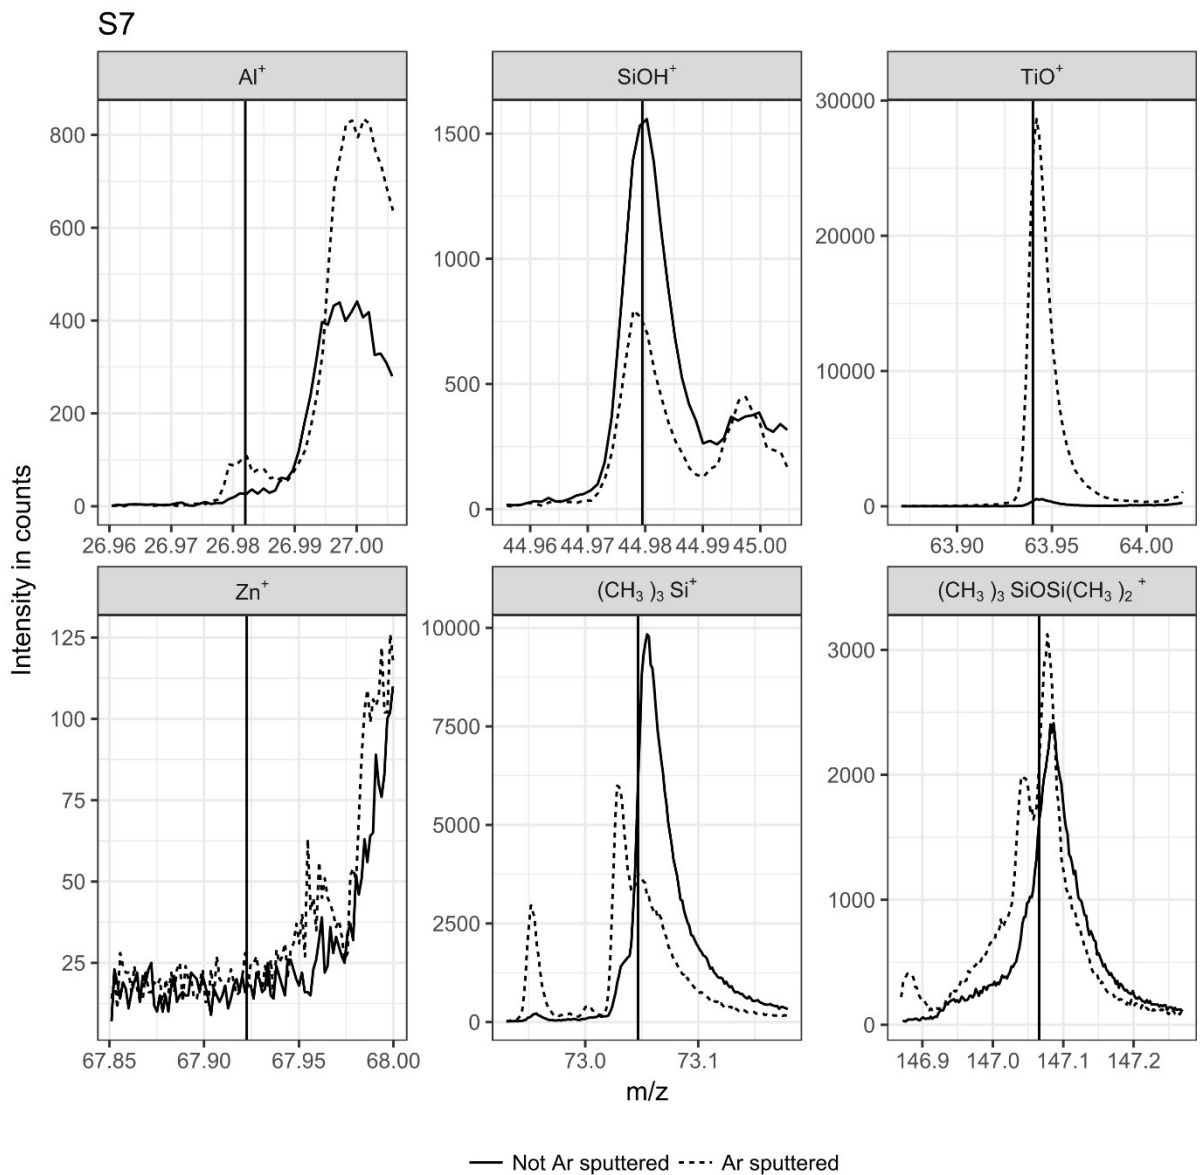

194

195 SI-Figure 10: ToF-SIMS signal intensities for the sunscreens extracts S7. See SI-figure 5 for more details.

196

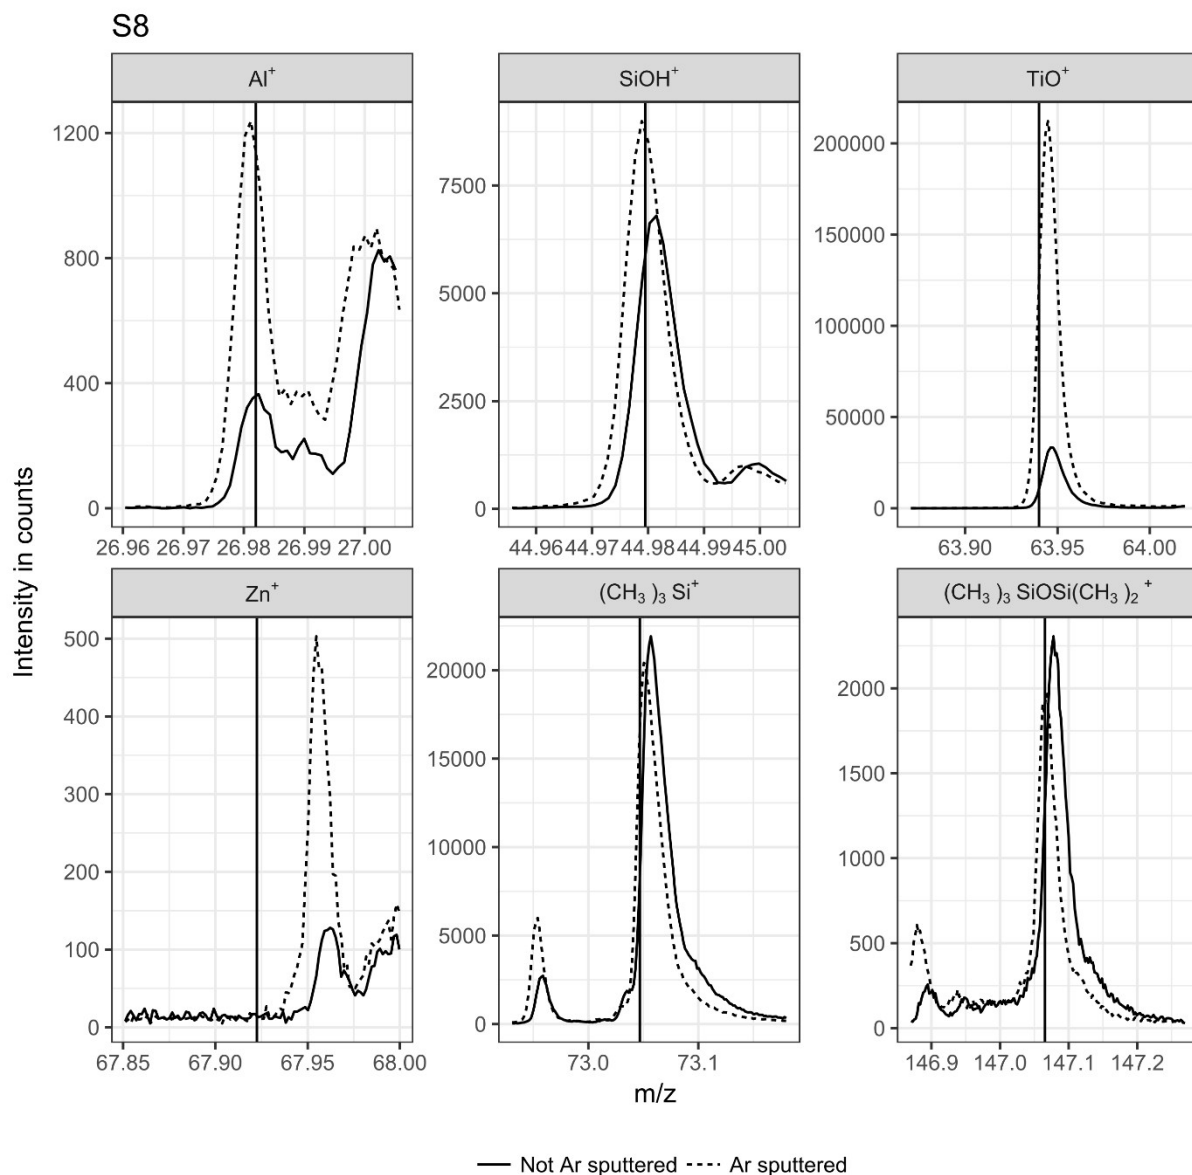

197

198 SI-Figure 11: ToF-SIMS signal intensities for the sunscreens extracts S8. See SI-figure 5 for more details.

199

S9

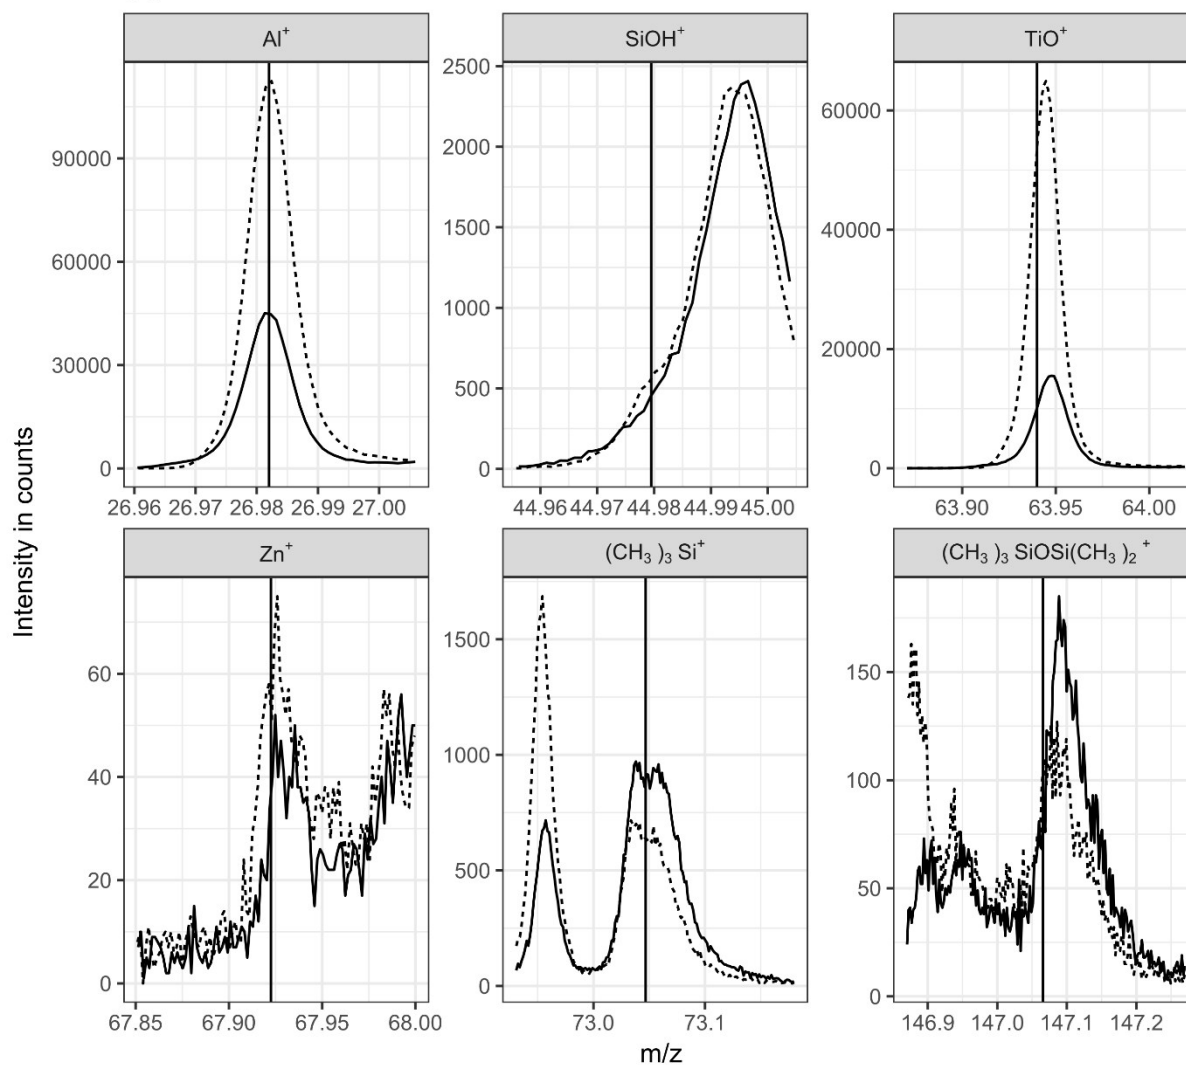

— Not Ar sputtered ---- Ar sputtered

200

201 SI-Figure 12: ToF-SIMS signal intensities for the sunscreens extracts S9. See SI-figure 5 for more details.

202



S10

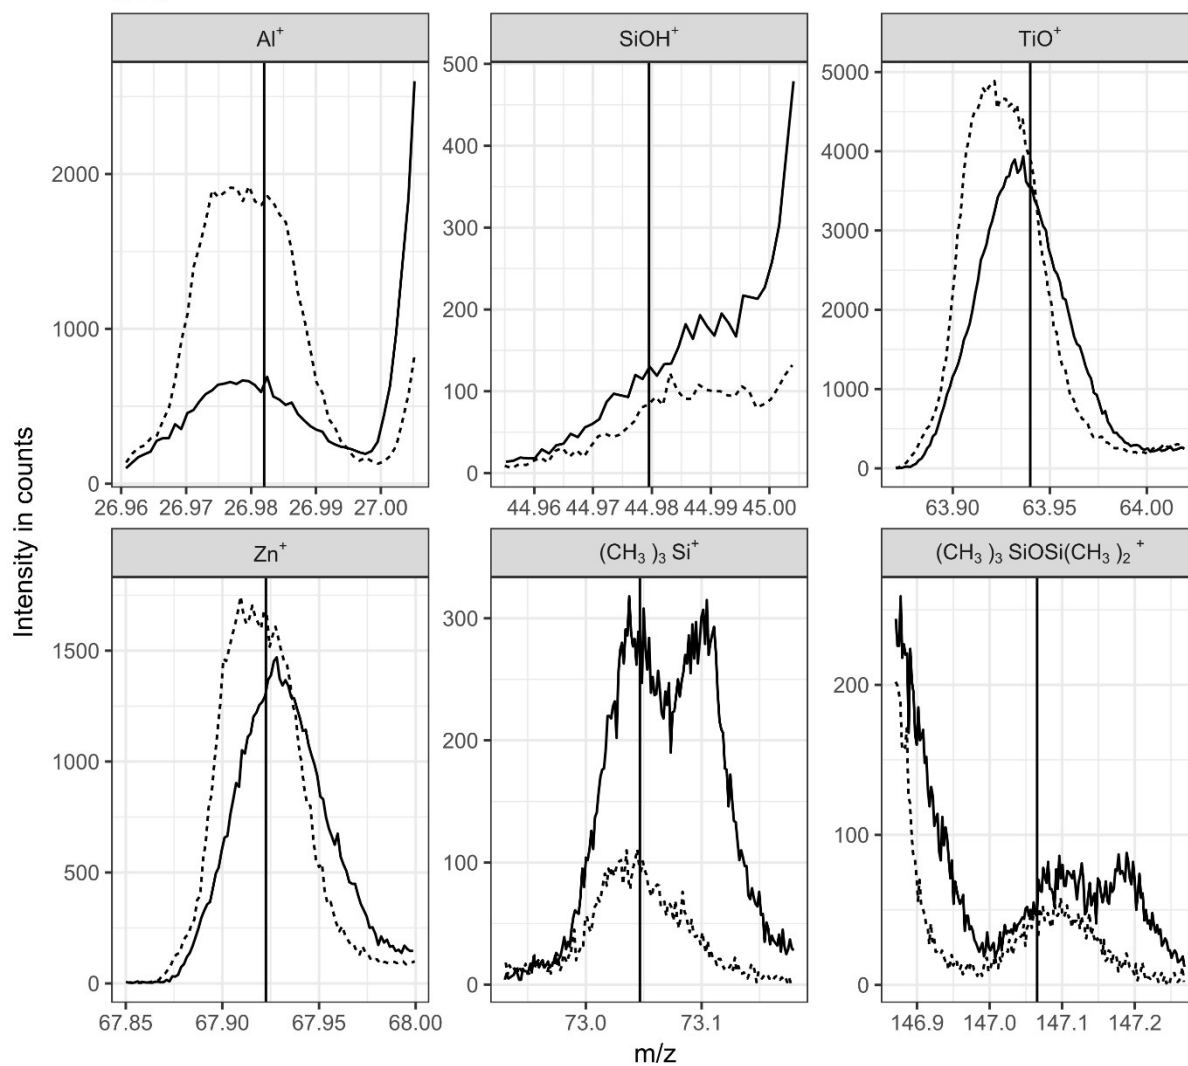

— Not Ar sputtered ···· Ar sputtered

203

204 SI-Figure 13: ToF-SIMS signal intensities for the sunscreens extracts S10. See SI-figure 5 for more details.

205

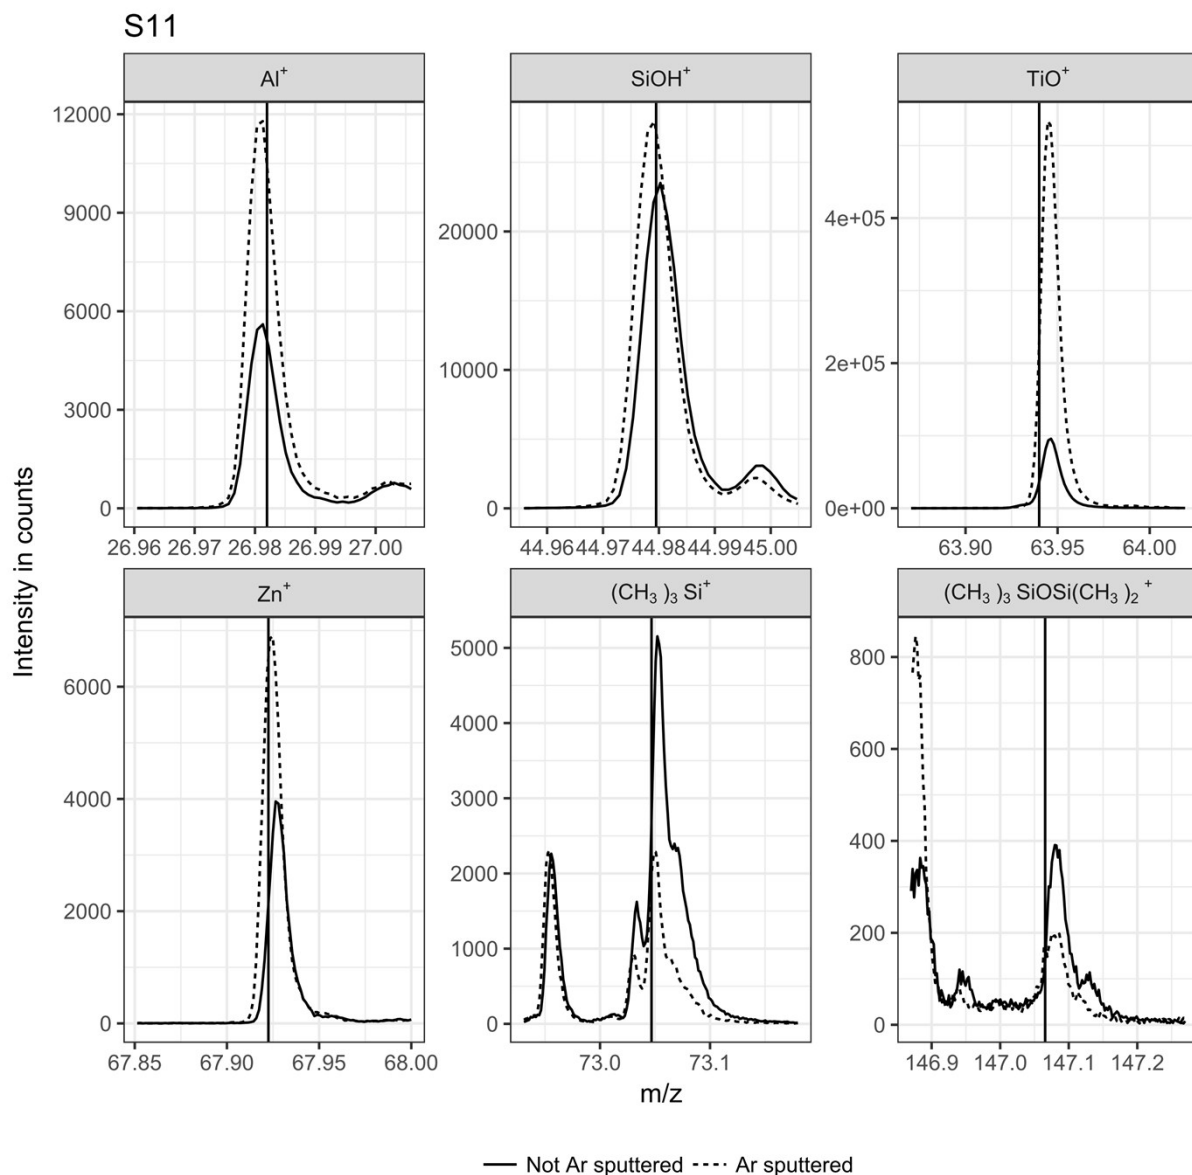

206

207 SI-Figure 14: ToF-SIMS signal intensities for the sunscreens extracts S11. See SI-figure 5 for more details.

208

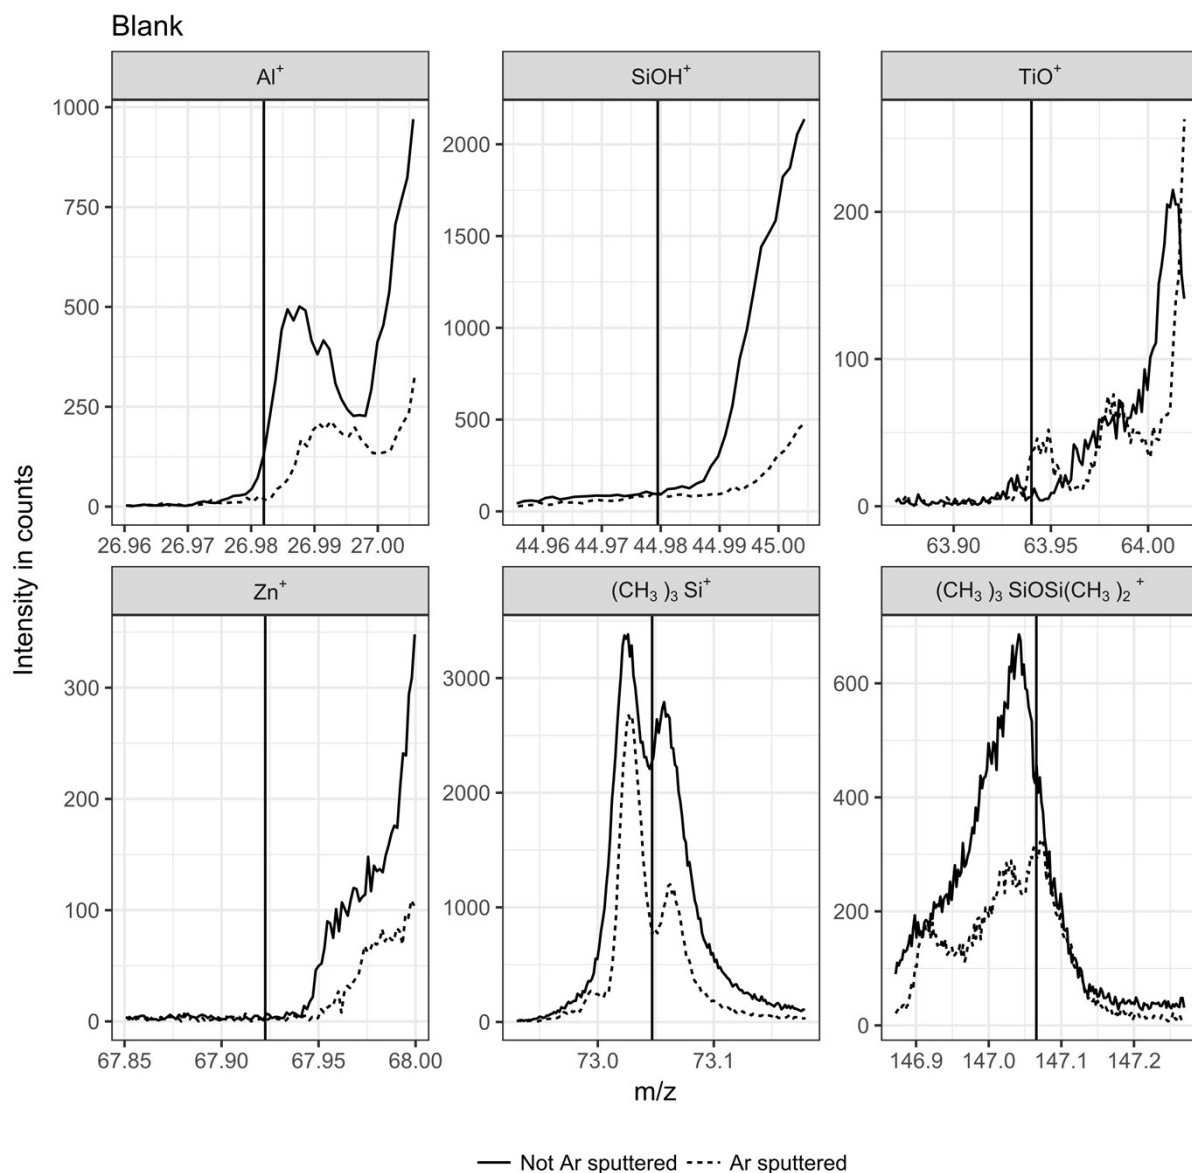

209

210 SI-Figure 15: ToF-SIMS signal intensities for the blank sample. See SI-figure 5 for more details.
